# Supplementary material
Source: PubMed Central journal article supplement (PMC7437424)

**Supplement Figure 1: D-Dimer levels.** The funnel plot of studies included in the analysis assessing D-dimer levels in dead versus survived COVID -19 patients.

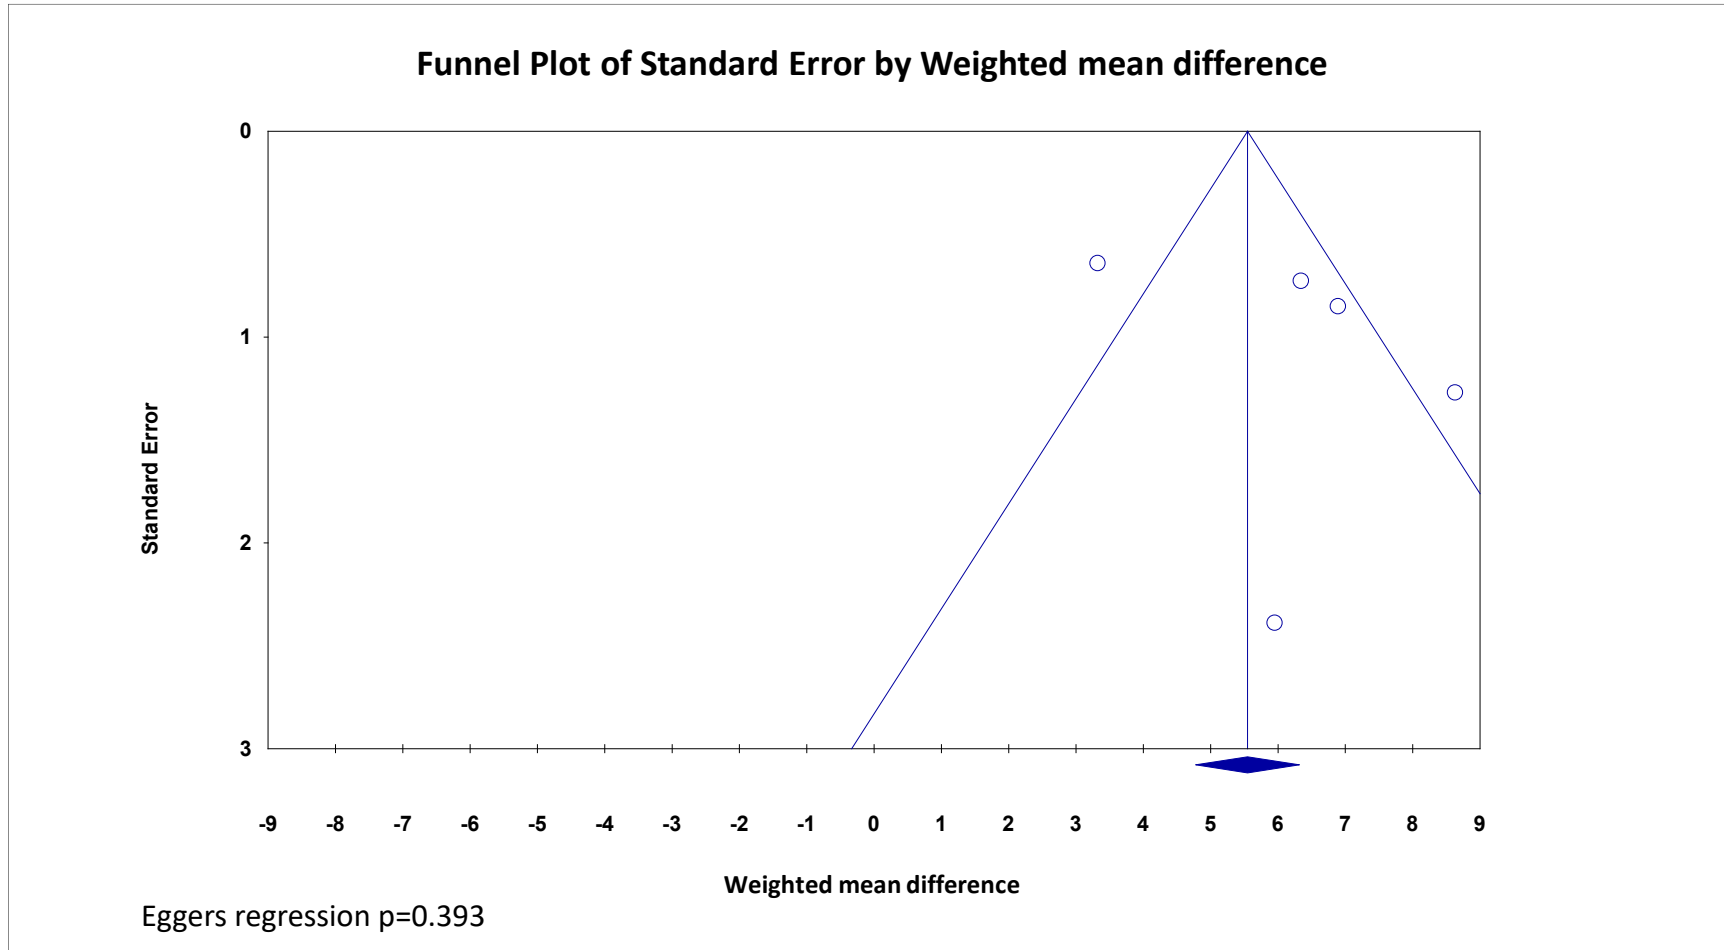

**Supplement Figure 2: All-cause mortality.** The funnel plot of studies assessing the association of elevated D-dimer and all-cause mortality in COVID-19 patients.

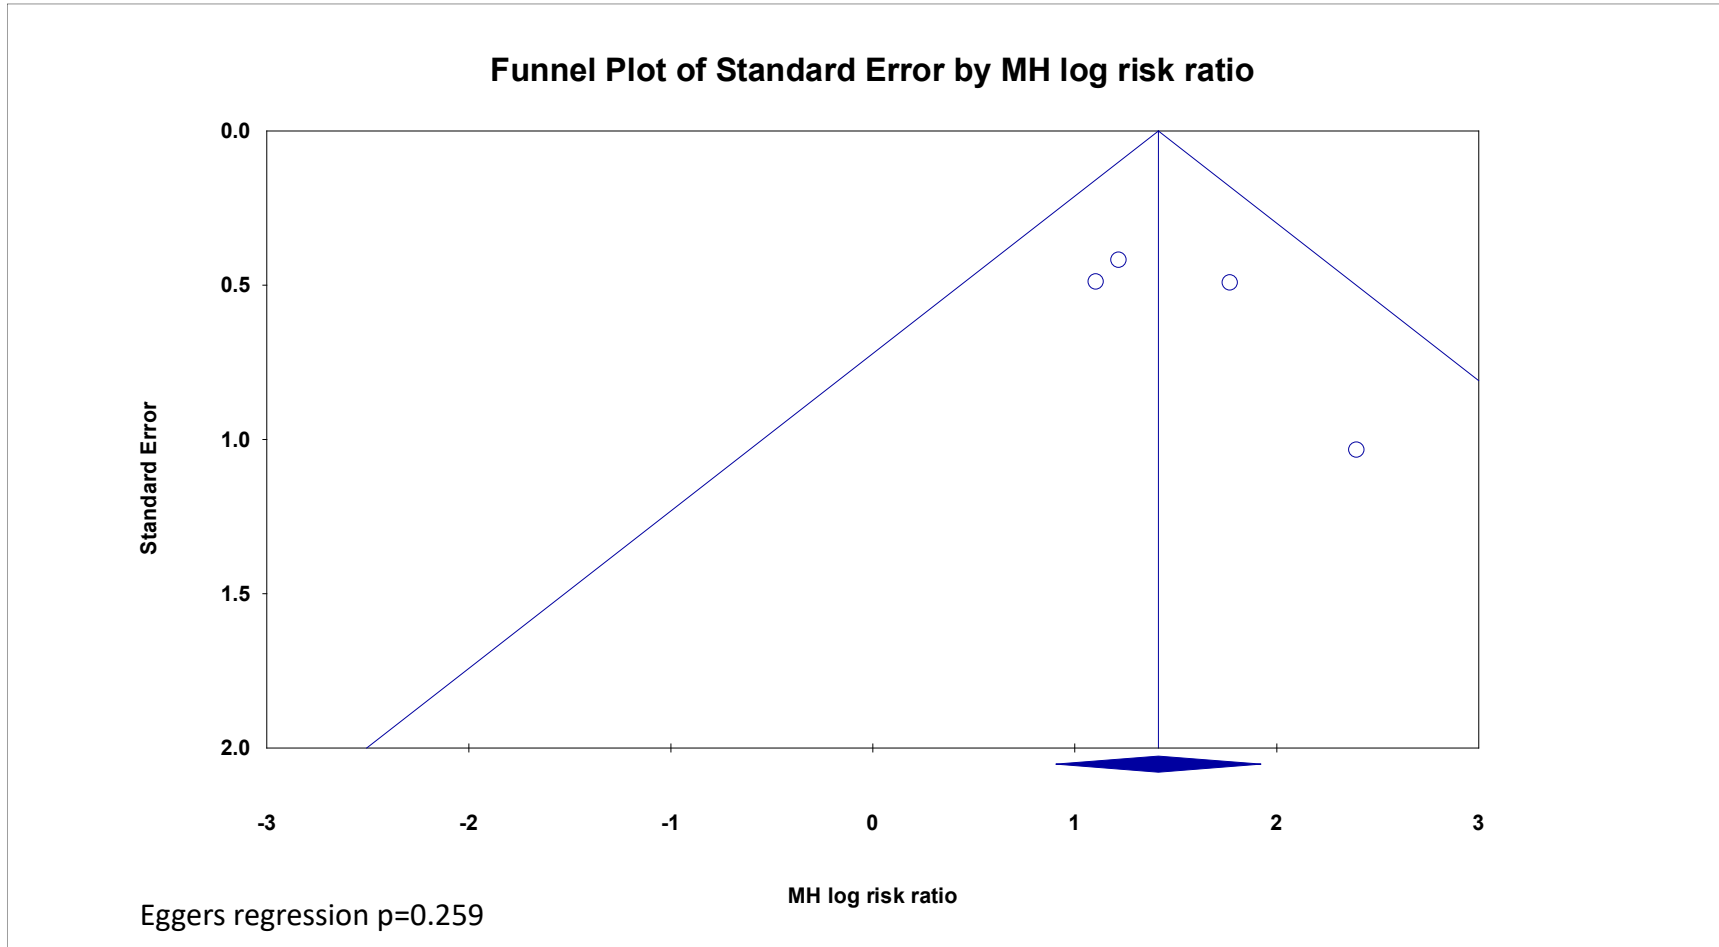

**Supplement Figure 3.** The funnel plot of studies included in the analysis assessing D-dimer levels in severe versus non-severe COVID-19 infected patients.

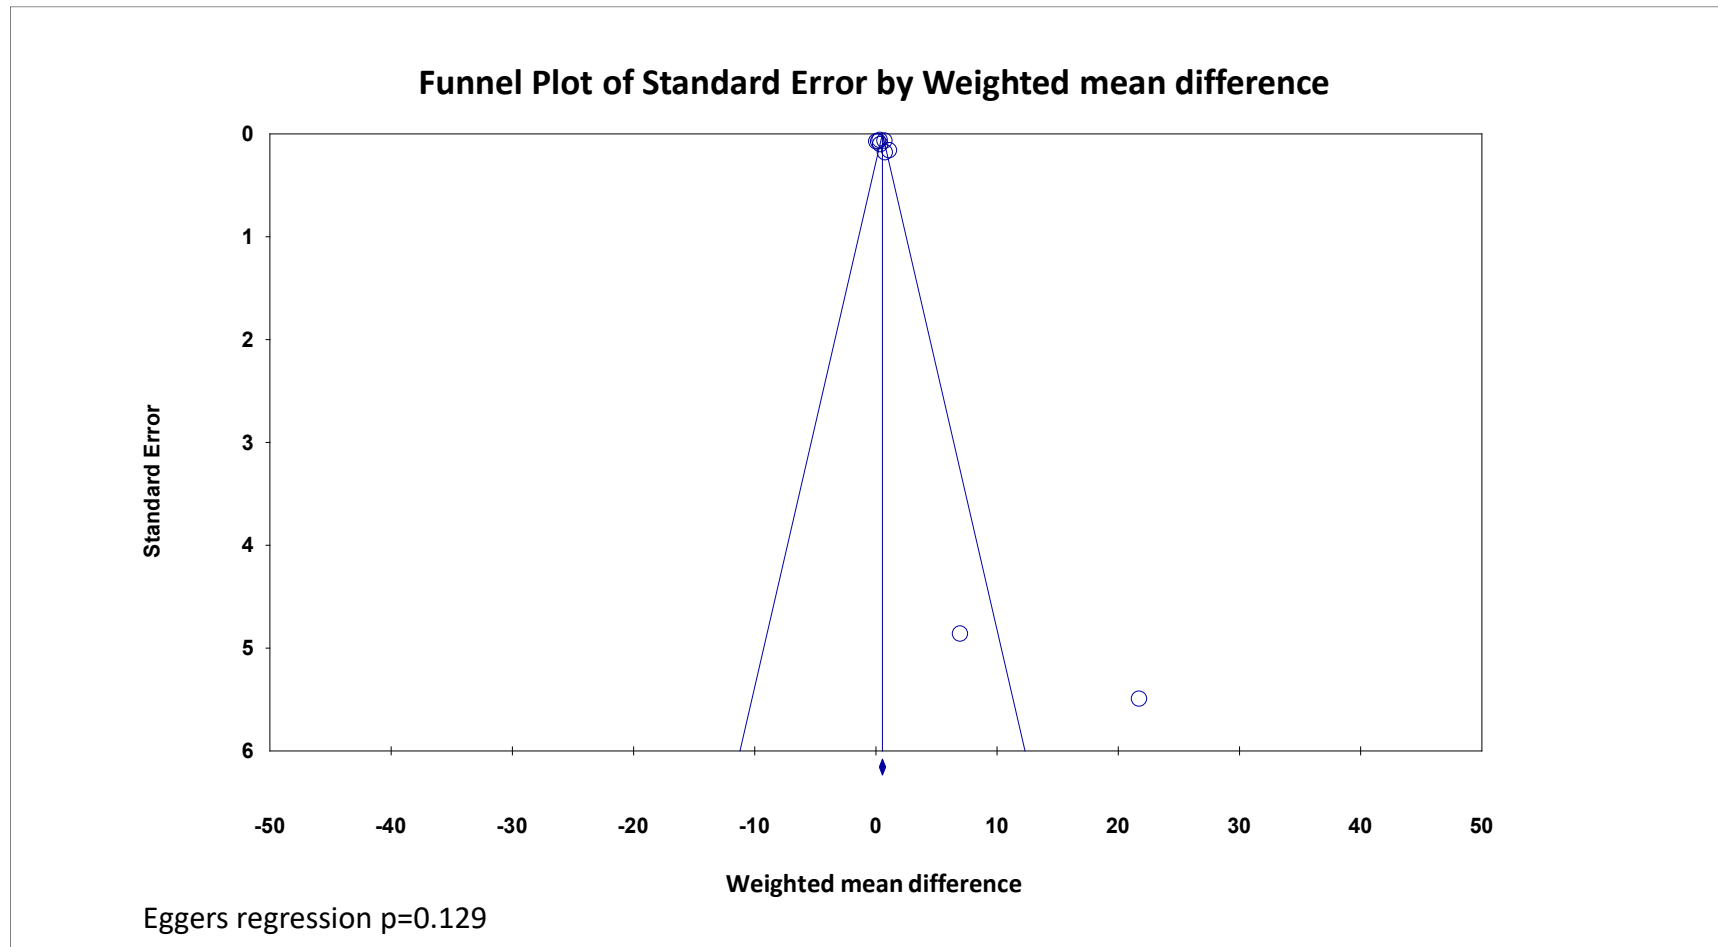

**Supplement Figure 4.** The funnel plot of studies assessing the association of elevated D-dimer and COVID-19 disease severity

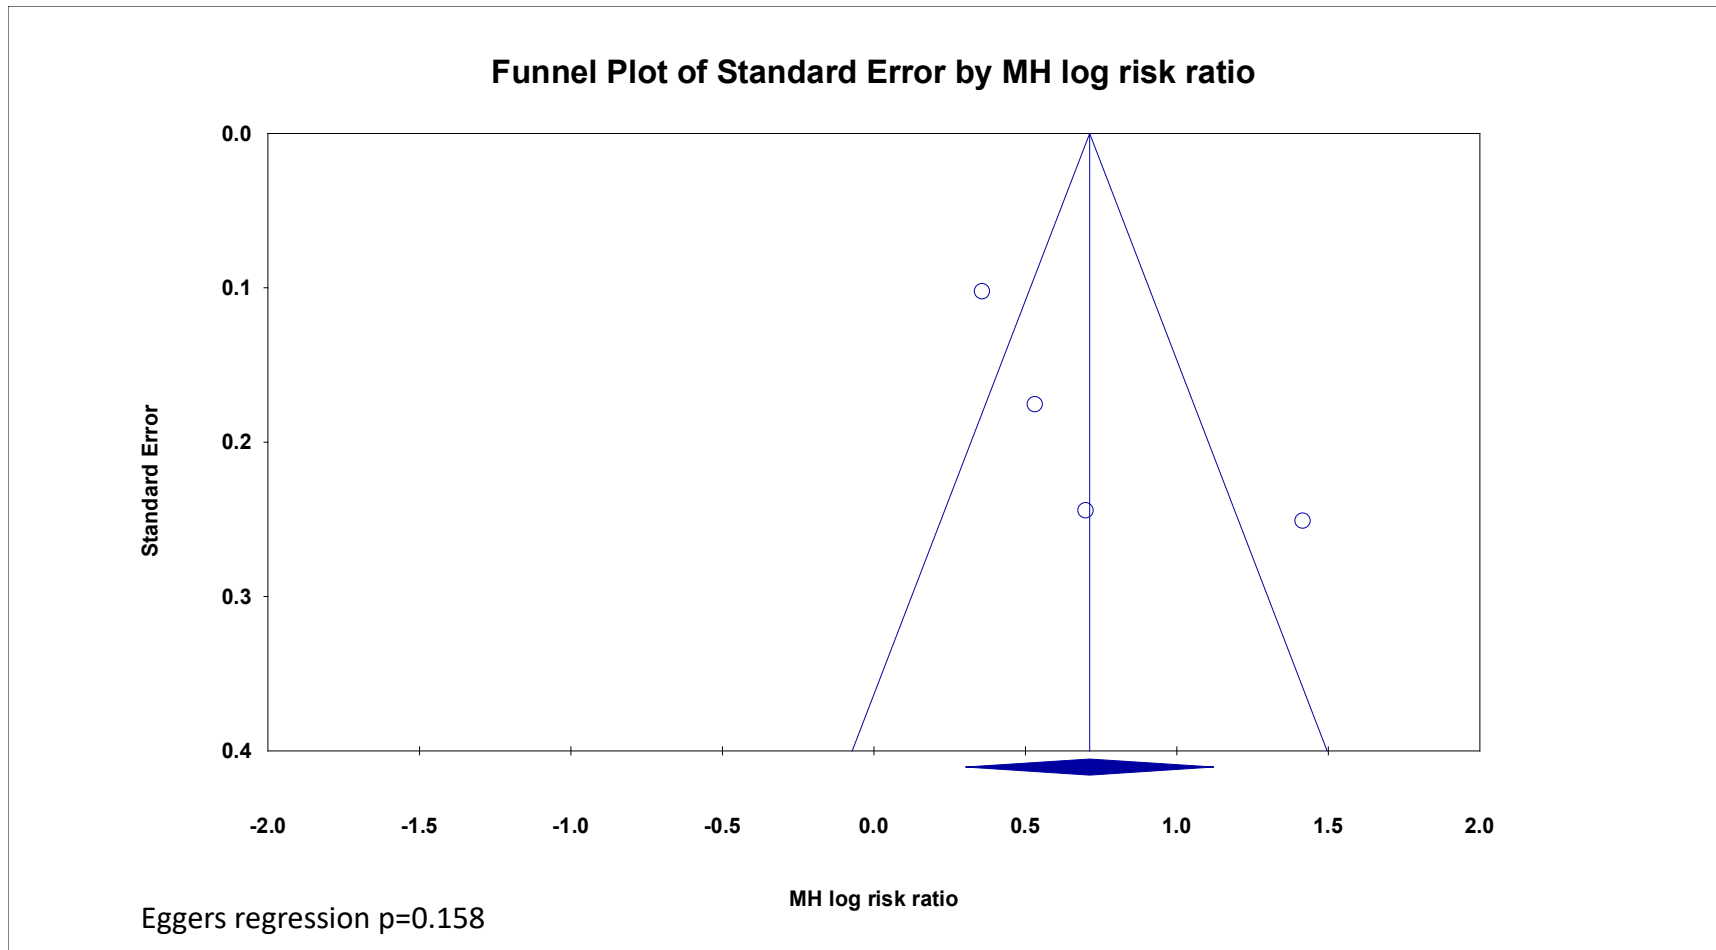

Supplement: crd-publish-ahead-of-print-10.1097.crd.0000000000000330-s001.pdf [file crd-publish-ahead-of-print-10.1097.crd.0000000000000330-s001.pdf]
